# Supplementary material for: Boreal–Arctic wetland methane emissions modulated by warming and vegetation activity
Source: PubMed Central journal article supplement (PMC10927558; doi:10.1038/s41558-024-01933-3), 2024-02-14
Supplement: 41558_2024_1933_MOESM1_ESM.pdf [file 41558_2024_1933_MOESM1_ESM.pdf]

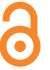

---

# **Boreal–Arctic wetland methane emissions modulated by warming and vegetation activity**

---

In the format provided by the authors and unedited

## Table of contents

1  
2  
3  
4  
5  
6  
7  
8  
9  
10  
11  
12  
13  
14  
15  
16  
17  
18  
19  
20  
21  
22  
23  
24  
25  
26  
27  
28  
29  
30  
31

**Figure S1.** Temporal coverage of chamber and eddy covariance observations, and the locations of atmospheric methane content observation sites.

**Figure S2.** Observed versus model simulated wetland methane emissions.

**Figure S3.** Yearly total wetland CH<sub>4</sub> emissions from 2002 to 2021.

**Figure S4.** Wetland CH<sub>4</sub> emissions in the Boreal-Arctic area from 2002-2021 during each season.

**Figure S5.** Contribution of abiotic and biotic drivers to wetland CH<sub>4</sub> emissions.

**Figure S6.** Wetland methane emission anomaly, and surface air temperature anomaly in 2005 and 2020.

**Figure S7.** Wetland methane emission anomaly, and surface air temperature anomaly in 2004, 2009, and 2014.

**Figure S8.** Inter-annual wetland CH<sub>4</sub> emissions in the Boreal-Arctic.

**Figure S9.** Model performance and increasing trend of wetland CH<sub>4</sub> emissions in the Boreal-Arctic during 2002-2021 using the leave-one-out validation and the temporal-cross-validation schemes.

**Figure S10.** Wetland CH<sub>4</sub> emissions with increasing trends in the Boreal-Arctic during 2002-2021 using different wetland extent datasets and different forcing datasets.

**Table S1.** Information of eddy covariance sites in this analysis.

**Table S2.** Information of chamber sites used to constrain the model in this study.

**Table S3.** Site id, name, and location of the atmospheric methane content observation sites.

**Table S4.** Sites that cover the year 2016 and its adjacent years, and show anomaly high temperature in 2016.

**Table S5.** Annual wetland methane emissions and trends estimated by different models.

**Text S1.** Combination of the BAWLD and WAD2M datasets.

**Text S2.** Inferring causal relationships.

**Text S3.** Sensitivity of CH<sub>4</sub> dynamics to wetland extent datasets.

**Text S4.** Sensitivity of CH<sub>4</sub> dynamics to inputting datasets.

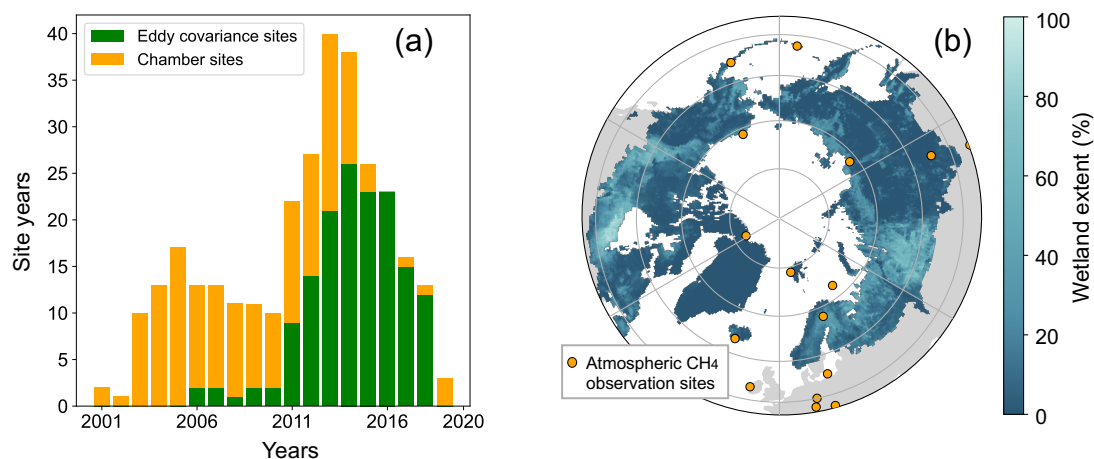

32  
 33 **Fig. S1.** (a) Temporal coverage of chamber and eddy covariance observations, and (b)  
 34 the locations of atmospheric methane content observation sites.

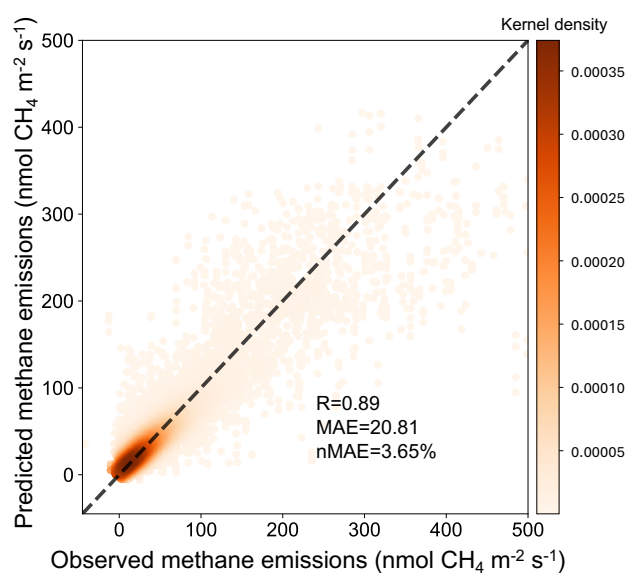

35  
 36 **Fig. S2.** Observed versus model simulated wetland methane emissions. Validation  
 37 results showed that the Pearson correlation coefficient (R), Mean Absolute Error  
 38 (MAE), and normalized MAE (nMAE) between estimated and measured CH<sub>4</sub>  
 39 emissions were 0.89, 20.81 (nmol CH<sub>4</sub> m<sup>-2</sup> s<sup>-1</sup>), and 3.65%, respectively.  
 40

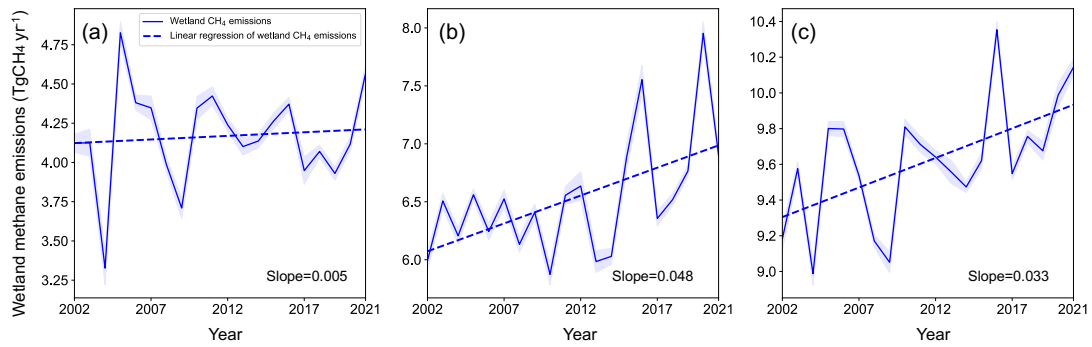

41

42 **Fig. S3.** Yearly total wetland CH<sub>4</sub> emissions (solid lines) from 2002 to 2021 and linear  
 43 regression results (dashed lines) in (a) the Hudson Bay lowlands ( $p=0.718$ , two-sided  
 44  $t$ -test), (b) the Western Siberian lowlands ( $p=0.012$ ), and (c) the rest of the Boreal-Arctic  
 45 area excluding hotspots ( $p=0.009$ ). The shaded blue area indicates the standard  
 46 deviation in estimated wetland CH<sub>4</sub> variability due to model parameter uncertainty.

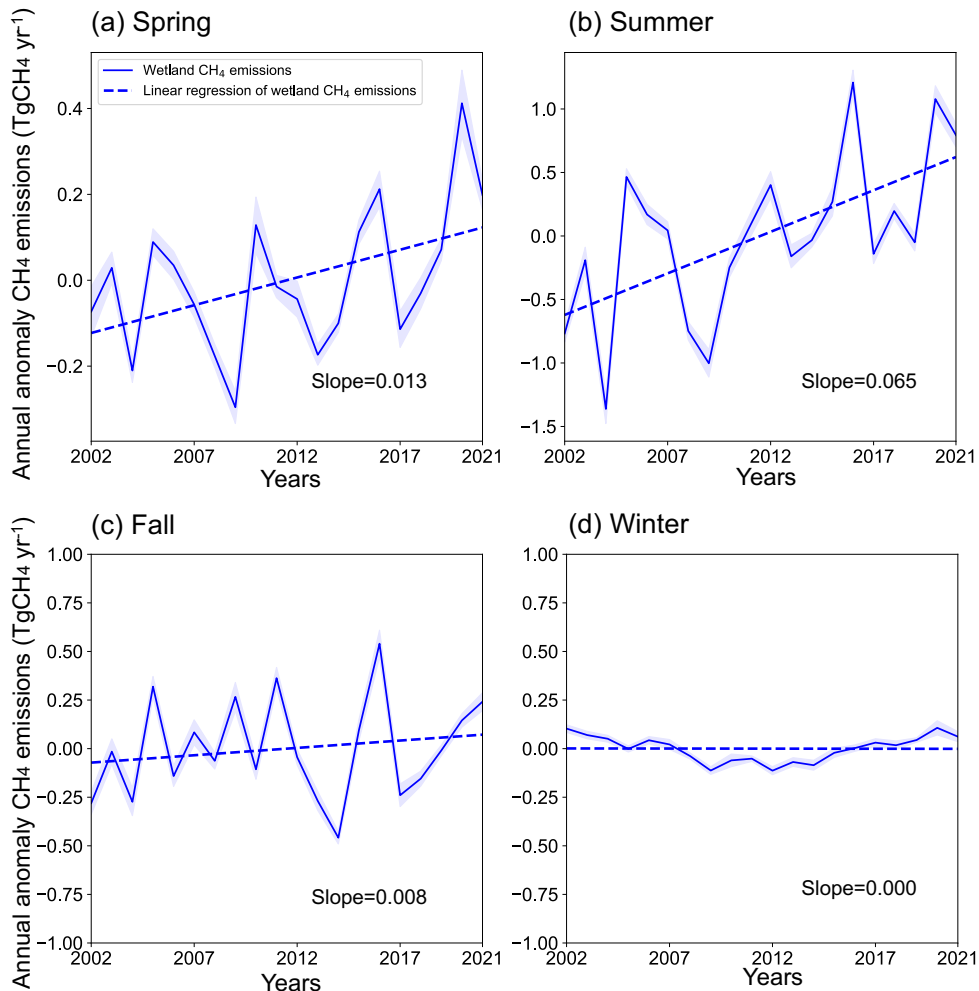

47

48 **Fig. S4.** Wetland CH<sub>4</sub> emissions in the Boreal-Arctic area from 2002-2021 during each  
 49 season. The shaded blue area indicates the standard deviation in estimated wetland CH<sub>4</sub>  
 50 emissions due to model parameter uncertainty; the dashed blue lines indicate the  
 51 linearly regressed trends of wetland CH<sub>4</sub> emissions.

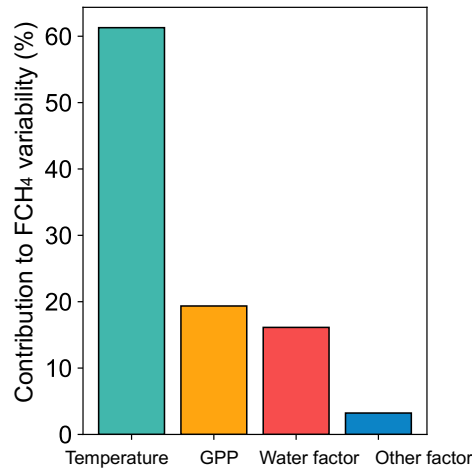

52

53 **Fig. S5.** Contribution of abiotic and biotic drivers to wetland CH<sub>4</sub> emissions (FCH<sub>4</sub>)  
 54 variability in the grid cells with site observations, represented as the percentage of grids  
 55 where wetland FCH<sub>4</sub> variability is dominated by temperature, GPP, water-related  
 56 drivers (soil moisture content and precipitation), and other drivers.

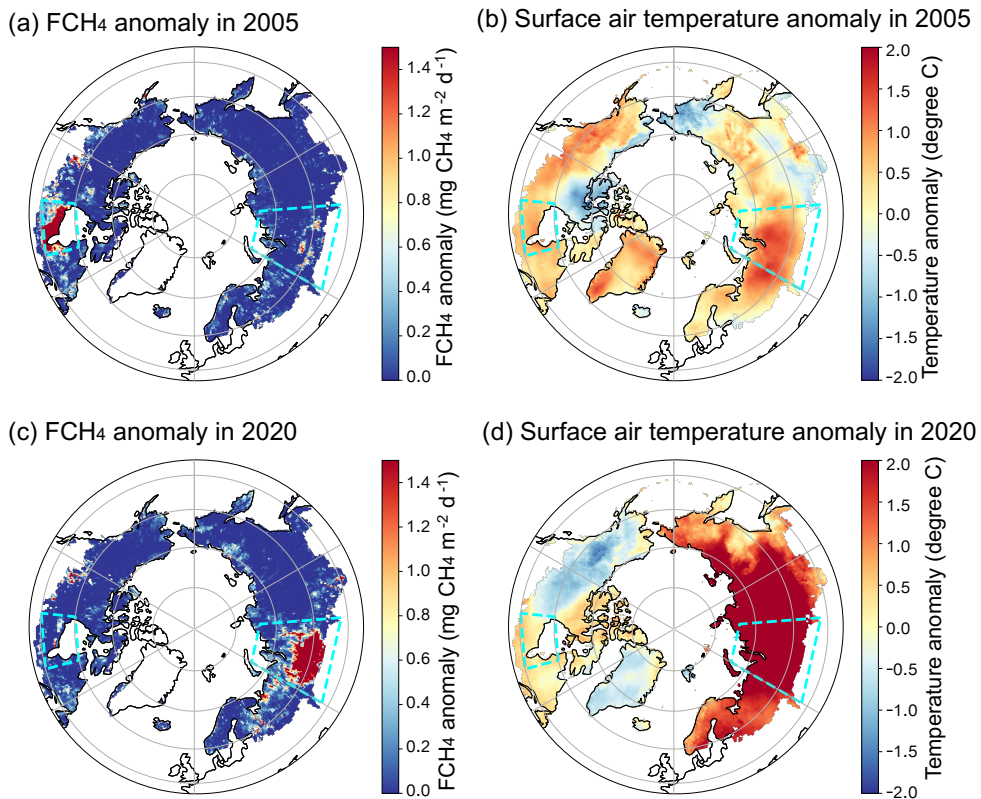

57

58 **Fig. S6.** Wetland methane flux (FCH<sub>4</sub>) anomaly, and surface air temperature anomaly  
 59 in 2005 and 2020. The anomalies were calculated relative to the multi-year annual mean  
 60 value from 2002 to 2021. The dashed boxes marked regions in (a)-(d) are two wetland  
 61 hotspots: Western Siberian lowland and Hudson Bay lowland.

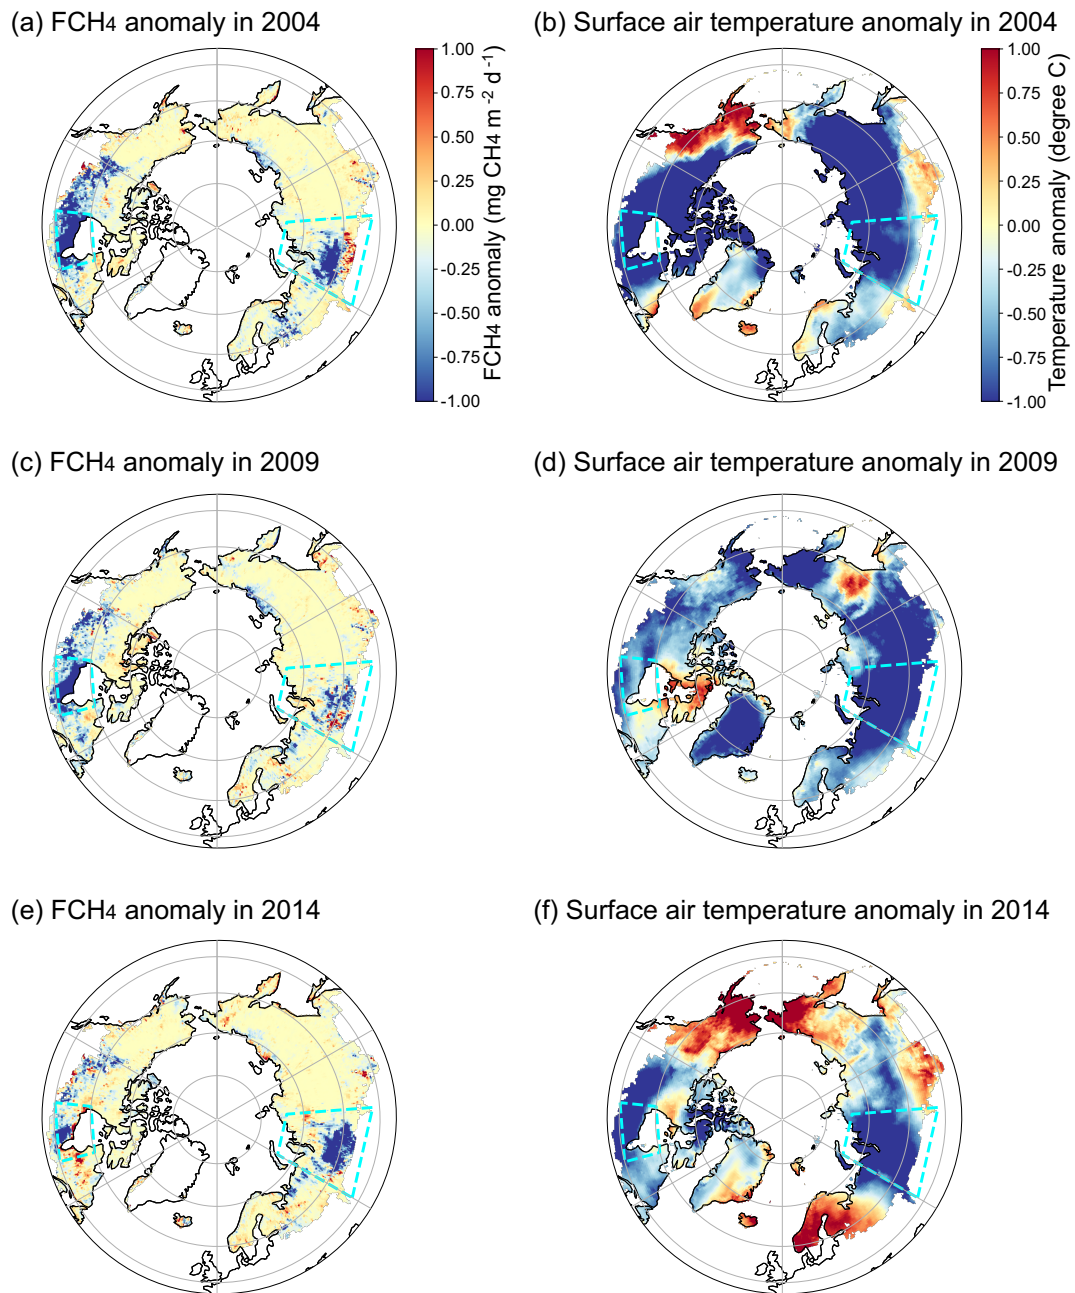

62

63 **Fig. S7.** Wetland methane flux (FCH<sub>4</sub>) anomaly, and surface air temperature anomaly  
 64 in 2004, 2009, and 2014. The anomalies were calculated relative to the multi-year  
 65 annual mean value from 2002 to 2021. The dashed boxes marked regions in (a)-(f) are  
 66 two wetland hotspots: Western Siberian lowland and Hudson Bay lowland.

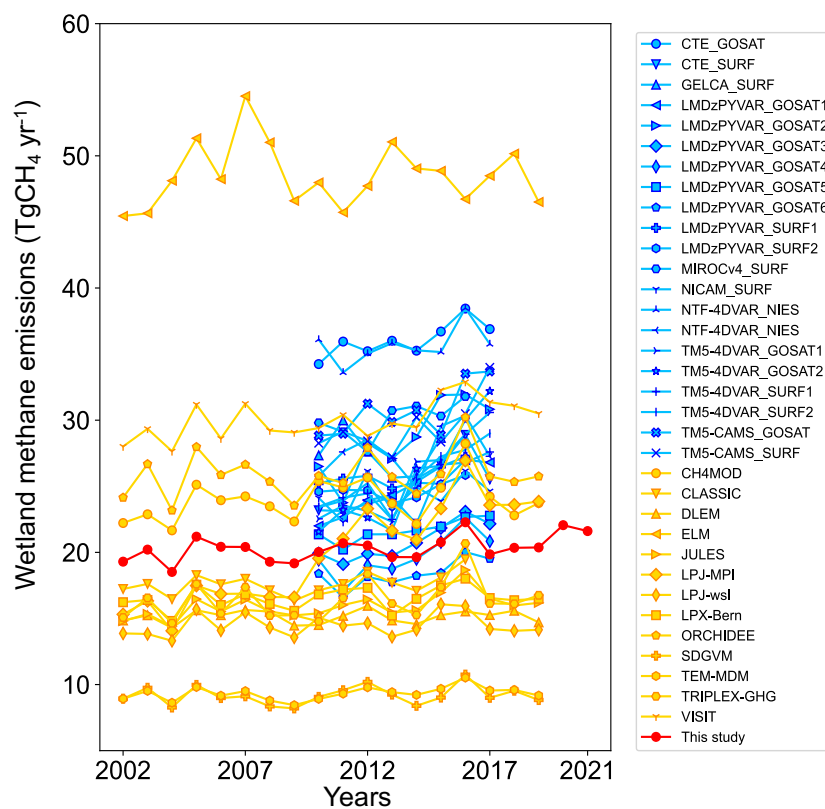

67

68 **Fig. S8.** Inter-annual wetland CH<sub>4</sub> emissions in the Boreal-Arctic estimated by top-  
 69 down models (blue lines), bottom-up models (gold lines), and this study (the red line).

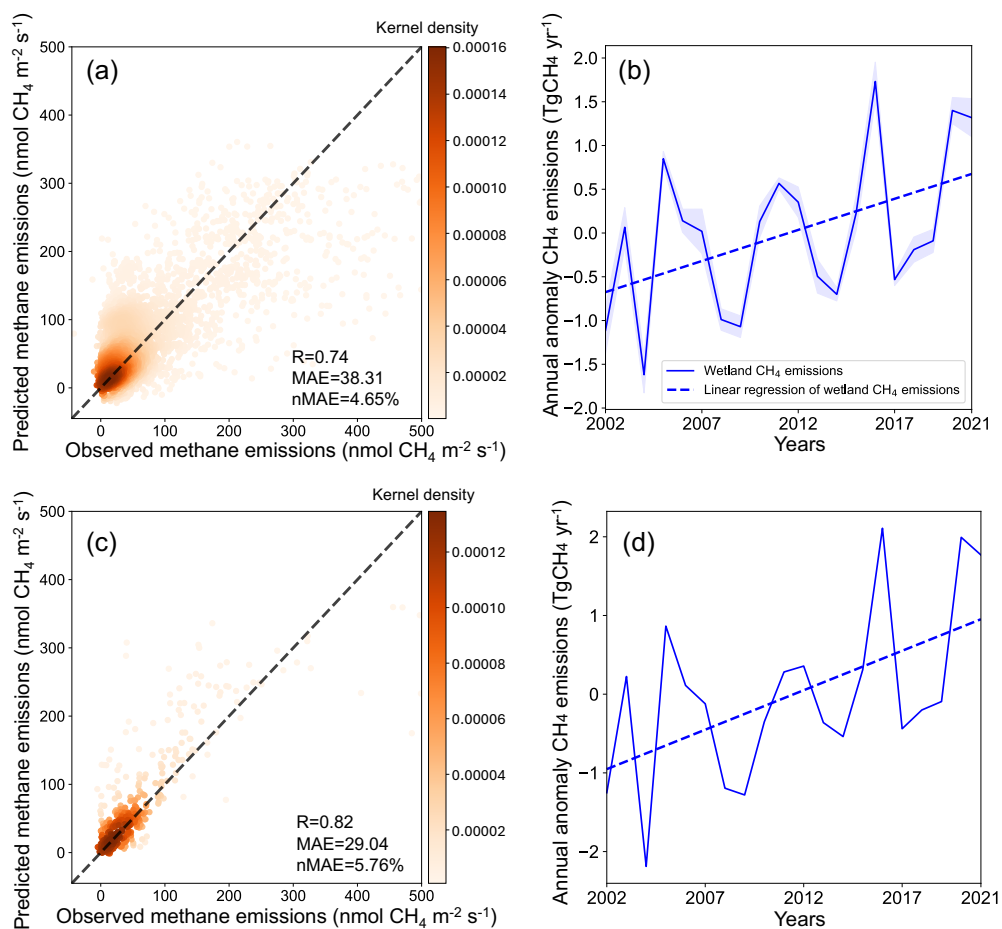

70

71 **Fig. S9.** Model performance and increasing trend of wetland CH<sub>4</sub> emissions in the  
 72 Boreal-Arctic during 2002-2021 using the leave-one-out validation and the temporal-  
 73 cross-validation schemes (see Methods). (a) and (c) indicate observed versus model  
 74 estimated wetland CH<sub>4</sub> emissions using leave-one-out validation scheme and the  
 75 temporal-cross-validation scheme, respectively. (b) and (d) indicate annual anomaly  
 76 Boreal-Arctic wetland CH<sub>4</sub> emissions based on leave-one-out validation and the  
 77 temporal-cross-validation scheme, respectively. The dashed lines in (b) and (d) indicate  
 78 the linearly regressed trends of wetland CH<sub>4</sub> emissions, and the shaded blue area in (b)  
 79 indicates the standard deviation in wetland CH<sub>4</sub> dynamics.

80



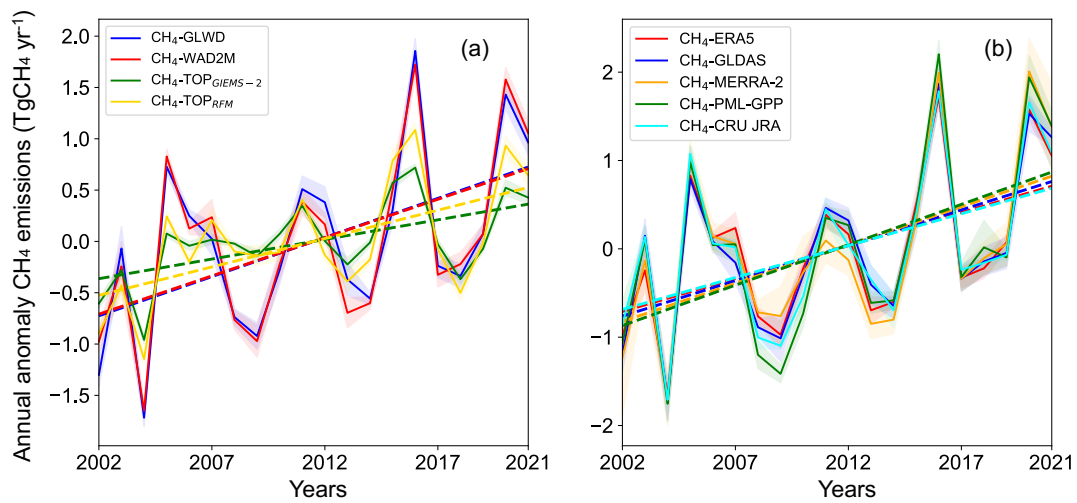

81

82 **Fig. S10.** Wetland CH<sub>4</sub> emissions with increasing trends in the Boreal-Arctic during  
 83 2002-2021 using (a) the wetland extent of GLWD, TOP<sub>GIEMS-2</sub>, TOP<sub>RFM</sub>, and WAD2M,  
 84 respectively (see Text S3), and (b) the inputting datasets of CRU JRA, GLDAS,  
 85 MERRA-2, and PML-GPP, respectively (see Text S4). The dashed lines and shaded  
 86 areas here indicate the linearly regressed trends, and standard deviation in estimated  
 87 wetland methane dynamics, respectively.

88

89

**Table S1.** Information of eddy covariance sites in this analysis.

| Site ID   | Wetland type | LAT  | LON    | Years     | Start month | End month | Data DOI                     | References |
|-----------|--------------|------|--------|-----------|-------------|-----------|------------------------------|------------|
| CA-SCB    | Bog          | 61.3 | -121.3 | 2014-2017 | 3           | 12        | DOI: 10.18140/FLX/1669613    | 29         |
| CA-SCC    | Bog          | 61.3 | -121.3 | 2013-2016 | 3           | 10        | DOI: 10.18140/FLX/1669628    | 30         |
| DE-SfN    | Bog          | 47.8 | 11.3   | 2012-2014 | 1           | 12        | DOI: 10.18140/FLX/1669635    | 31         |
| FI-Si2    | Bog          | 61.8 | 24.2   | 2012-2016 | 1           | 11        | DOI: 10.18140/FLX/1669639    | 32         |
| JP-BBY    | Bog          | 43.3 | 141.8  | 2015-2018 | 2           | 12        | DOI: 10.18140/FLX/1669646    | 33         |
| US-BZB    | Bog          | 64.7 | -148.3 | 2014-2016 | 4           | 11        | DOI: 10.18140/FLX/1669668    | 34         |
| US-Uaf    | Bog          | 64.9 | -147.9 | 2011-2018 | 4           | 10        | DOI: 10.18140/FLX/1669701    | 35         |
| Interior  | Bog          | 64.7 | -148.3 | 2013      | 6           | 8         | DOI: 10.1002/2014JG002683    | 36         |
| Scotty    | Bog          | 61.4 | -121.3 | 2014-2016 | 6           | 8         | DOI: 10.1111/gcb.13520       | 37         |
| DE-Hte    | Fen          | 54.2 | 12.2   | 2011-2018 | 1           | 12        | DOI: 10.18140/FLX/1669634    | 38         |
| DE-Zrk    | Fen          | 53.9 | 12.9   | 2013-2018 | 1           | 12        | DOI: 10.18140/FLX/1669636    | 39         |
| FI-Lom    | Fen          | 68.0 | 24.2   | 2006-2010 | 1           | 12        | DOI: 10.18140/FLX/1669638    | 40         |
| FI-Sii    | Fen          | 61.8 | 24.2   | 2013-2018 | 1           | 12        | DOI: 10.18140/FLX/1669640    | 41         |
| SE-Deg    | Fen          | 64.2 | 19.6   | 2014-2018 | 1           | 12        | DOI: 10.18140/FLX/1669659    | 42         |
| SE-St1    | Fen          | 68.4 | 19.1   | 2012-2014 | 1           | 12        | DOI: 10.18140/FLX/1669660    | 43         |
| US-BZF    | Fen          | 64.7 | -148.3 | 2014-2016 | 4           | 10        | DOI: 10.18140/FLX/1669669    | 44         |
| US-Los    | Fen          | 46.1 | -90.0  | 2014-2018 | 1           | 12        | DOI: 10.18140/FLX/1669682    | 45         |
| Stordalen | Fen          | 68.3 | 19.1   | 2012      | 6           | 8         | DOI: 10.5194/bg-14-5189-2017 | 46         |
| Churchill | Fen          | 58.7 | -93.8  | 2009-2012 | 6           | 7         | DOI: 10.5194/bg-10-4465-2013 | 47         |
| US-DPW    | Marsh        | 28.1 | -81.4  | 2013-2017 | 1           | 12        | DOI: 10.18140/FLX/1669672    | 48         |
| US-LA2    | Marsh        | 29.9 | -90.3  | 2011-2013 | 1           | 12        | DOI: 10.18140/FLX/1669681    | 49         |
| US-Myb    | Marsh        | 38.0 | -121.8 | 2011-2018 | 1           | 12        | DOI: 10.18140/FLX/1669685    | 50         |
| US-ORv    | Marsh        | 40.0 | -83.0  | 2011-2015 | 1           | 12        | DOI: 10.18140/FLX/1669689    | 51         |
| US-Sne    | Marsh        | 38.0 | -121.8 | 2016-2018 | 1           | 12        | DOI: 10.18140/FLX/1669693    | 52         |
| US-Tw1    | Marsh        | 38.1 | -121.6 | 2011-2018 | 1           | 12        | DOI: 10.18140/FLX/1669696    | 53         |
| US-Tw4    | Marsh        | 38.1 | -121.6 | 2013-2018 | 1           | 12        | DOI: 10.18140/FLX/1669698    | 54         |
| US-WPT    | Marsh        | 41.5 | -83.0  | 2011-2013 | 1           | 12        | DOI: 10.18140/FLX/1669702    | 55         |
| Stordalen | Marsh        | 68.4 | 19.1   | 2006-2007 | 7           | 8         | DOI: 10.1029/2008JG000913    | 56         |
| RU-Ch2    | Wet tundra   | 68.6 | 161.4  | 2014-2016 | 1           | 12        | DOI: 10.18140/FLX/1669654    | 57,58      |
| RU-Sam    | Wet tundra   | 72.4 | 126.5  | 2011-2014 | 4           | 9         | DOI:10.18140/FLX/1440185     | 59         |

|        |            |      |        |           |   |    |                           |    |
|--------|------------|------|--------|-----------|---|----|---------------------------|----|
| US-Beo | Wet tundra | 71.3 | -156.6 | 2013-2014 | 1 | 12 | DOI: 10.18140/FLX/1669664 | 60 |
| US-Bes | Wet tundra | 71.3 | -156.6 | 2013-2015 | 1 | 12 | DOI: 10.18140/FLX/1669665 | 61 |
| US-ICs | Wet tundra | 68.6 | -149.3 | 2014-2016 | 5 | 10 | DOI: 10.18140/FLX/1669678 | 62 |
| US-Ivo | Wet tundra | 68.5 | -155.8 | 2013-2016 | 1 | 12 | DOI: 10.18140/FLX/1669679 | 63 |
| US-NGB | Wet tundra | 71.3 | -156.6 | 2012-2018 | 4 | 10 | DOI: 10.18140/FLX/1669687 | 64 |
| Denali | Wet tundra | 63.9 | -149.2 | 2016-2017 | 5 | 10 | DOI: 10.1029/2018JG004444 | 65 |

The observations of Interior, Scotty, Stordalen, Churchill, and Denali are obtained from BAWLD-CH<sub>4</sub> dataset <sup>66</sup>, and the rest sites are obtained from Fluxnet-CH<sub>4</sub> dataset <sup>67,68</sup>.

**Table S2.** Information of chamber sites used to constrain the model in this study. The datasets are obtained from BAWLD-CH<sub>4</sub> dataset <sup>66</sup> and the datasets in Bao et al. <sup>69</sup>

| Site_ID    | Wetland type | Lats | Lons   | Years     | Start month | End month | DOI                                                    | References |
|------------|--------------|------|--------|-----------|-------------|-----------|--------------------------------------------------------|------------|
| Athabasca  | Bog          | 55.0 | -112.5 | 2007      | 5           | 9         | DOI: 10.1111/j.1365-2486.2009.02083.x                  | 70         |
| Atqasuk    | Marsh        | 70.5 | -157.4 | 2014      | 7           | 8         | DOI: 10.1007/s10021-016-9991-0                         | 71         |
| Bac_ST     | Fen          | 68.4 | 19.1   | 2003-2006 | 6           | 9         | DOI: 10.5194/bg-7-95-2010<br>DOI: 10.1029/2008JG000703 | 72,73      |
| Barkchar   | Bog          | 57.0 | 82.6   | 2013-2014 | 7           | 7         | DOI: 10.3103/S1068373917050077                         | 74         |
| Barkchar   | Fen          | 57.0 | 82.6   | 2013-2014 | 7           | 7         | DOI: 10.3103/S1068373917050077                         | 74         |
| Barrow     | WetTundra    | 71.3 | -156.6 | 2007      | 7           | 8         | DOI: 10.1029/2009JG001283                              | 75         |
| Barrow     | WetTundra    | 71   | -157   | 2005      | 6           | 8         | DOI: 10.1029/2006JG000314                              | 76         |
| Bonanza    | Fen          | 65.4 | -148.5 | 2005      | 7           | 10        | DOI: 10.1029/2007JG000496                              | 77         |
| Bonanza    | Marsh        | 64.7 | -148.3 | 2004      | 5           | 8         | DOI: 10.1029/2005JG000099                              | 78         |
| Bonanza    | Fen          | 64.8 | -147.9 | 2005-2013 | 6           | 8         | DOI: 10.1111/gcb.13612                                 | 79         |
| Bottemyra  | Bog          | 69.7 | 29.2   | 2011      | 7           | 7         | DOI: 10.3389/fmicb.2015.00356                          | 80         |
| Bottemyra  | Marsh        | 69.7 | 29.2   | 2011      | 7           | 7         | DOI: 10.3389/fmicb.2015.00356                          | 80         |
| Bro_MB     | Bog          | 45.7 | -75.9  | 2011-2012 | 6           | 9         | DOI: 10.1002/2013JG002576                              | 81         |
| Chokurdakh | WetTundra    | 70.8 | 147.4  | 2004-2006 | 7           | 8         | DOI: 10.5194/bg-4-985-2007                             | 82         |
| Cor_KO     | Fen          | 68.6 | 161.3  | 2002      | 6           | 9         | DOI: 10.1111/j.1365-2486.2005.01023.x                  | 83         |
| Des_FE     | Fen          | 62.1 | -50.2  | 2007      | 6           | 9         | DOI: 10.1111/j.1747-0765.2009.00389.x                  | 84         |
| Emm_LH     | Fen          | 81.8 | -71.4  | 2012      | 6           | 9         | DOI: 10.5194/bg-11-3095-2014                           | 85         |
| Fort       | Fen          | 57.0 | -111.5 | 2011-2014 | 5           | 10        | DOI: 10.1007/s11273-020-09715-2                        | 86         |
| Fort       | Fen          | 56.6 | -111.3 | 2015      | 5           | 8         | DOI: 10.1016/j.scitotenv.2017.01.076                   | 87         |
| Fort       | Bog          | 56.4 | -111.2 | 2011-2014 | 5           | 10        | DOI: 10.1007/s11273-020-09715-2                        | 86         |

|                    |           |      |        |           |                       |                        |                                                                                                                                                                                     |                          |
|--------------------|-----------|------|--------|-----------|-----------------------|------------------------|-------------------------------------------------------------------------------------------------------------------------------------------------------------------------------------|--------------------------|
| Fort               | Fen       | 56.4 | -111.2 | 2011-2015 | 2011:6<br>2012-2015:5 | 2011:8<br>2012-2015:10 | DOI: 10.1016/j.scitotenv.2017.01.076<br>DOI: 10.1007/s11273-020-09715-2                                                                                                             | 86,87                    |
| Hudson             | Bog       | 52.7 | -84.0  | 2013-2014 | 6                     | 8                      | -                                                                                                                                                                                   | Harris L.I. unpublished  |
| Hudson             | Fen       | 52.7 | -84.0  | 2013-2014 | 6                     | 8                      | -                                                                                                                                                                                   | Harris L.I. unpublished  |
| Innoko             | Fen       | 63.6 | -157.7 | 2011      | 7                     | 7                      | DOI: 10.1088/1748-9326/9/10/109601                                                                                                                                                  | 88                       |
| Innoko             | Bog       | 63.6 | -157.7 | 2011      | 7                     | 7                      | DOI: 10.1088/1748-9326/9/10/109601                                                                                                                                                  | 88                       |
| James              | Fen       | 54.1 | -72.5  | 2009-2010 | 7                     | 8                      | DOI: 10.1007/s10533-012-9767-3                                                                                                                                                      | 89                       |
| James              | Bog       | 53.7 | -78.2  | 2012      | 7                     | 8                      | DOI: 10.1016/j.atmosenv.2013.09.044                                                                                                                                                 | 90                       |
| Komi               | Fen       | 67.1 | 63.0   | 2007-2008 | 6                     | 8                      | DOI: 10.5194/bgd-12-13931-2015                                                                                                                                                      | 91                       |
| La                 | Fen       | 53.6 | -77.7  | 2003      | 6                     | 8                      | DOI: 10.1029/2006JG000216                                                                                                                                                           | 92                       |
| La                 | Marsh     | 53.6 | -77.7  | 2003      | 6                     | 8                      | DOI: 10.1029/2006JG000216                                                                                                                                                           | 92                       |
| La                 | Bog       | 53.6 | -77.7  | 2003      | 6                     | 8                      | DOI: 10.1029/2006JG000216                                                                                                                                                           | 92                       |
| Lakkasuo           | Bog       | 61.8 | 24.3   | 2001      | 6                     | 9                      | DOI: 10.5194/bg-17-727-2020                                                                                                                                                         | 93                       |
| LekVorkutaK<br>omi | Marsh     | 67.4 | 63.4   | 2001      | 6                     | 8                      | DOI: 10.1029/2003GB002054                                                                                                                                                           | 94                       |
| Lutose             | Bog       | 59.5 | -117.2 | 2017-2019 | 5                     | 10                     | -                                                                                                                                                                                   | Heffernan et al. in prep |
| Mer_SA             | Fen       | 70   | 161.6  | 2005      | 6                     | 9                      | DOI: 10.1111/j.1365-2486.2009.01962.x                                                                                                                                               | 95                       |
| Par_WE             | Fen       | 70.8 | 147.5  | 2007-2009 | 6                     | 9                      | DOI: 10.1029/2010JG001637                                                                                                                                                           | 96                       |
| Par_MI             | Fen       | 70.8 | 147.5  | 2007-2009 | 6                     | 9                      | DOI: 10.1029/2010JG001637                                                                                                                                                           | 96                       |
| Par_DR             | Fen       | 70.8 | 147.5  | 2007-2009 | 6                     | 9                      | DOI: 10.1029/2010JG001637                                                                                                                                                           | 96                       |
| Sac_DW             | Fen       | 72.4 | 126.5  | 2006      | 6                     | 9                      | DOI: 10.1111/j.1365-2486.2010.02232.x                                                                                                                                               | 97                       |
| Sac_LR             | Fen       | 72.4 | 126.5  | 2006      | 6                     | 9                      | DOI: 10.1029/2007JG000505                                                                                                                                                           | 98                       |
| Mye_BB             | Bog       | 65.1 | -148.6 | 2004      | 6                     | 9                      | DOI: 10.1029/2007JG000423                                                                                                                                                           | 99                       |
| Mye_FF             | Fen       | 65.1 | -148.6 | 2004      | 6                     | 9                      | DOI: 10.1029/2007JG000423                                                                                                                                                           | 99                       |
| Neleger            | WetTundra | 62   | 130    | 2007      | 6                     | 8                      | DOI: 10.1111/j.1747-0765.2009.00389.x                                                                                                                                               | 84                       |
| Northern           | Bog       | 69.5 | 27.2   | 2008      | 6                     | 8                      | DOI: 10.1111/gcb.12975                                                                                                                                                              | 100                      |
| Northern           | Fen       | 68.0 | 24.2   | 2008-2010 | 6                     | 8                      | <a href="https://helda.helsinki.fi/bitstream/handle/10138/228286/ber20-4-489.pdf?sequence=1">https://helda.helsinki.fi/bitstream/handle/10138/228286/ber20-4-489.pdf?sequence=1</a> | 101                      |
| Northern           | Fen       | 67.4 | 26.7   | 2012      | 7                     | 8                      | DOI: 10.5194/bg-14-799-2017                                                                                                                                                         | 102                      |
| Noyabr'sk          | Bog       | 63.2 | 74.8   | 2010      | 7                     | 8                      | DOI: 10.3103/S0147687412010061                                                                                                                                                      | 103                      |
| Pel_G1             | Fen       | 53.9 | -78.8  | 2003      | 6                     | 9                      | DOI: 10.1029/2006JG000216                                                                                                                                                           | 92                       |
| Pel_G2             | Bog       | 53.6 | -77.7  | 2003      | 6                     | 9                      | DOI: 10.1029/2006JG000216                                                                                                                                                           | 92                       |

|             |       |      |        |                    |             |             |                                                                                                                                                                                     |        |
|-------------|-------|------|--------|--------------------|-------------|-------------|-------------------------------------------------------------------------------------------------------------------------------------------------------------------------------------|--------|
| Pel_G3      | Marsh | 53.6 | -76.1  | 2003               | 6           | 9           | DOI: 10.1029/2006JG000216                                                                                                                                                           | 92     |
| Pir_ZA      | Fen   | 74.5 | -21.0  | 2010               | 6           | 9           | DOI: 10.1007/s13280-016-0893-3                                                                                                                                                      | 104    |
| Rhe_BE      | Fen   | 71   | -157   | 2005               | 6           | 9           | DOI: 10.1029/2006JG000314                                                                                                                                                           | 76     |
| Scn_ZA      | Fen   | 74.5 | -20.6  | 2005               | 6           | 9           | DOI: 10.1016/j.soilbio.2011.09.005                                                                                                                                                  | 105    |
| Siikaneva   | Bog   | 61.8 | 24.2   | 2012-2014          | 6           | 8           | DOI: 10.5194/bg-15-1749-2018                                                                                                                                                        | 106    |
|             |       |      |        |                    | 6           | 8           | <a href="https://helda.helsinki.fi/bitstream/handle/10138/228286/ber20-4-489.pdf?sequence=1">https://helda.helsinki.fi/bitstream/handle/10138/228286/ber20-4-489.pdf?sequence=1</a> | 101    |
| Southern    | Marsh | 61.8 | 24.3   | 2008-2010          |             |             |                                                                                                                                                                                     |        |
|             |       |      |        |                    | 6           | 8           | <a href="https://helda.helsinki.fi/bitstream/handle/10138/228286/ber20-4-489.pdf?sequence=1">https://helda.helsinki.fi/bitstream/handle/10138/228286/ber20-4-489.pdf?sequence=1</a> | 101    |
| SouthernFin | Marsh | 62.2 | 23.4   | 2008-2010          |             |             |                                                                                                                                                                                     |        |
|             |       |      |        |                    |             |             |                                                                                                                                                                                     |        |
| Stordalen   | Bog   | 68.4 | 19.1   | 2000,<br>2003-2006 | 7,7         | 7,8         | DOI: 10.1029/2001JD001030<br>DOI: 10.5194/bg-7-95-2010                                                                                                                              | 72,107 |
| Stordalen   | Bog   | 68.4 | 19.0   | 2012-2014          | 7           | 8           | DOI: 10.5194/bg-12-3119-2015                                                                                                                                                        | 108    |
|             |       |      |        |                    | 2000:7,     | 2000:7,     | DOI: 10.1029/2001JD001030                                                                                                                                                           |        |
| Stordalen   | Fen   | 68.4 | 19.1   | 2000,<br>2003-2006 | 2003-2006:7 | 2003-2006:8 | DOI: 10.1016/j.soilbio.2007.01.019<br>DOI: 10.5194/bg-7-95-2010                                                                                                                     | 109    |
| Stordalen   | Marsh | 68.4 | 19.0   | 2012-2015          | 7           | 8           | DOI: 10.5194/bg-12-3119-2015                                                                                                                                                        | 108    |
| Str_SC      | Fen   | 46.7 | -71.2  | 2004               | 6           | 9           | DOI: 10.1007/s10021-005-0070-1                                                                                                                                                      | 110    |
| Str_ZA      | Fen   | 74.5 | -20.5  | 2011-2013          | 6           | 9           | DOI: 10.1016/j.soilbio.2011.09.005                                                                                                                                                  | 105    |
| Tag_ZA      | Fen   | 74.5 | -20.6  | 2007-2009          | 6           | 9           | DOI: 10.3402/tellusb.v65i0.19722                                                                                                                                                    | 111    |
| Tak_WG      | Marsh | 62.3 | 129.5  | 2005               | 6           | 9           | DOI: 10.1029/2007JG000521                                                                                                                                                           | 112    |
| Tanana      | Bog   | 64.6 | -148.3 | 2004               | 7           | 8           | DOI: 10.1029/2007JG000423                                                                                                                                                           | 99     |
| Taz         | Bog   | 67.4 | 78.9   | 2010               | 7           | 8           | DOI: 10.17816/edgcc211-16                                                                                                                                                           | 113    |
| Teslin      | Bog   | 60.1 | -131.4 | 2013               | 7           | 8           | DOI: 10.1038/nclimate3328                                                                                                                                                           | 114    |
| Tur_AP      | Fen   | 65.4 | -148.5 | 2005-2006          | 6           | 9           | DOI: 10.1029/2007JG000496                                                                                                                                                           | 77     |
| Van_SM      | Marsh | 62.4 | 130.0  | 2005               | 6           | 9           | DOI: 10.1016/j.agrformet.2008.08.008                                                                                                                                                | 115    |
|             |       |      |        |                    | 6           | 9           | DOI: 10.5194/bg-4-985-2007                                                                                                                                                          | 82,116 |
| Van_SR      | Fen   | 70.8 | 147.4  | 2004-2006          |             |             | DOI: 10.1029/2005JG000010                                                                                                                                                           |        |
| Van_ST      | Fen   | 62.4 | 130.0  | 2005               | 6           | 9           | DOI: 10.1016/j.agrformet.2008.08.008                                                                                                                                                | 115    |
| Wandering   | Bog   | 55.4 | -112.5 | 2011-2013          | 5           | 9           | DOI: 10.1007/s10021-014-9795-z                                                                                                                                                      | 117    |
| WesternNew  | Bog   | 48.3 | -58.7  | 2013               | 7           | 8           | DOI: 10.1088/1748-9326/9/10/105005                                                                                                                                                  | 118    |
| WesternSib  | Fen   | 56.2 | 78.4   | 2013               | 7           | 8           | DOI: 10.1134/S1062359016020060                                                                                                                                                      | 119    |

|             |       |      |        |           |   |   |                                       |     |
|-------------|-------|------|--------|-----------|---|---|---------------------------------------|-----|
| WesternSib  | Marsh | 56.2 | 78.4   | 2013      | 7 | 8 | DOI: 10.1134/S1062359016020060        | 119 |
| WesternSib  | Fen   | 55.2 | 78.2   | 2013      | 7 | 8 | DOI: 10.1134/S1062359016020060        | 119 |
| WesternSib  | Fen   | 56.5 | 78.3   | 2011      | 7 | 8 | DOI: 10.1088/1748-9326/9/4/045008     | 120 |
| WesternSib  | Fen   | 56.4 | 78.8   | 2011      | 7 | 8 | DOI: 10.1088/1748-9326/9/4/045008     | 120 |
| WesternSib  | Fen   | 55.8 | 78.4   | 2013      | 7 | 8 | DOI: 10.1134/S1062359016020060        | 119 |
| Wil_SI      | Fen   | 72.4 | 126.5  | 2003-2004 | 6 | 9 | DOI: 10.1111/j.1365-2486.2008.01586.x | 121 |
| Yakutsk     | Fen   | 62.3 | 129.6  | 2004-2006 | 7 | 8 | DOI: 10.1016/j.agrformet.2008.08.008  | 115 |
| Yakutsk     | Marsh | 62.2 | 129.6  | 2004-2006 | 7 | 8 | DOI: 10.1016/j.agrformet.2008.08.008  | 115 |
| Yellowknife | Bog   | 62.5 | -114.5 | 2014      | 7 | 7 | DOI: 10.1038/nclimate3328             | 114 |
| Zon_BE      | Fen   | 71.5 | -157.0 | 2007      | 6 | 9 | DOI: 10.1029/2009GB003487             | 122 |

**Table S3.** Site id, name, and location of the atmospheric methane content observation sites, and the mean values and trends of methane contents. (\* $p<0.1$ , \*\* $p<0.05$ , and \*\*\* $p<0.01$ ).

| Site_id | Site_name                                              | LAT   | LON     | Mean CH4 content (ppb) | trend    |
|---------|--------------------------------------------------------|-------|---------|------------------------|----------|
| ALT     | Alert, Nunavut, Canada                                 | 82.45 | -62.51  | 1898.467               | 0.543*** |
| BAL     | Baltic Sea, Poland                                     | 55.35 | 17.22   | 1895.737               | 0.259*** |
| BRW     | Barrow Atmospheric Baseline Observatory, United States | 71.32 | -156.61 | 1909.031               | 0.544*** |
| CBA     | Cold Bay, Alaska, United States                        | 55.21 | -162.72 | 1897.286               | 0.612*** |
| HPB     | Hohenpeissenberg, Germany                              | 47.8  | 11.02   | 1946.113               | 0.624*** |
| HUN     | Hegyhatsal, Hungary                                    | 46.95 | 16.65   | 1945.406               | 0.476*** |
| ICE     | Storhofdi, Vestmannaeyjar, Iceland                     | 63.4  | -20.29  | 1892.464               | 0.540*** |
| KZD     | Sary Taukum, Kazakhstan                                | 44.08 | 76.87   | 1880.285               | 0.395**  |
| KZM     | Plateau Assy, Kazakhstan                               | 43.25 | 77.99   | 1846.999               | 0.137**  |
| LLB     | Lac La Biche, Alberta, Canada                          | 54.95 | 112.47  | 1941.489               | 0.820    |
| MHD     | Mace Head, County Galway, Ireland                      | 53.33 | -9.9    | 1887.412               | 0.553*** |
| OXK     | Ochsenkopf, Germany                                    | 50.03 | 11.81   | 1929.801               | 0.530*** |
| PAL     | Pallas-Sammaltunturi, GAW Station, Finland             | 67.97 | 24.12   | 1911.230               | 0.528*** |
| SHM     | Shemya Island, Alaska, United States                   | 52.71 | 174.13  | 1891.924               | 0.556*** |
| SUM     | Summit, Greenland                                      | 72.6  | 38.42   | 1890.394               | 0.567*** |
| TIK     | Hydrometeorological Observatory of Tiksi, Russia       | 71.6  | 128.89  | 1938.278               | 0.774*** |
| UUM     | Ulaan Uul, Mongolia                                    | 44.45 | 111.1   | 1891.359               | 0.509*** |

|                                                                                                                                                                                                                                                                                                                                                                                                            |                                         |       |       |          |          |
|------------------------------------------------------------------------------------------------------------------------------------------------------------------------------------------------------------------------------------------------------------------------------------------------------------------------------------------------------------------------------------------------------------|-----------------------------------------|-------|-------|----------|----------|
| ZEP                                                                                                                                                                                                                                                                                                                                                                                                        | Ny-Alesund, Svalbard, Norway and Sweden | 78.91 | 11.89 | 1899.470 | 0.527*** |
| The observations are obtained from: Lan, X., E.J. Dlugokencky, J.W. Mund, A.M. Crotnell, M.J. Crotnell, E. Moglia, M. Madronich, D. Neff and K.W. Thoning (2022), Atmospheric Methane Dry Air Mole Fractions from the NOAA GML Carbon Cycle Cooperative Global Air Sampling Network, 1983-2021, Version: 2022-07-28, <a href="https://doi.org/10.15138/VNCZ-M766">https://doi.org/10.15138/VNCZ-M766</a> . |                                         |       |       |          |          |

**Table S4.** Sites that cover the year 2016 and its adjacent years, and show anomaly high temperature in 2016.

| Site name | Years     | TA mean<br>(K) | TA anomaly<br>in 2016 (K) | FCH <sub>4</sub> mean<br>(nmol CH <sub>4</sub> m <sup>-2</sup> s <sup>-1</sup> ) | FCH <sub>4</sub> anomaly in 2016<br>(nmol CH <sub>4</sub> m <sup>-2</sup> s <sup>-1</sup> ) |
|-----------|-----------|----------------|---------------------------|----------------------------------------------------------------------------------|---------------------------------------------------------------------------------------------|
| CASCB     | 2014-2017 | 272.70         | 0.16                      | 36.28                                                                            | 0.67                                                                                        |
| CASCC     | 2013-2016 | 272.70         | 0.16                      | 30.90                                                                            | 3.06                                                                                        |
| USBZB     | 2014-2016 | 272.36         | 0.77                      | 46.25                                                                            | 6.41                                                                                        |
| USUAF     | 2011-2018 | 271.74         | 1.87                      | 2.71                                                                             | 2.14                                                                                        |
| DEHTE     | 2011-2018 | 282.98         | 0.14                      | 158.98                                                                           | 16.91                                                                                       |
| USBZF     | 2014-2016 | 272.36         | 0.77                      | 48.44                                                                            | 16.56                                                                                       |
| USLOS     | 2014-2018 | 277.71         | 1.22                      | 18.85                                                                            | 5.84                                                                                        |
| RUCH2     | 2014-2016 | 263.71         | 1.18                      | 25.67                                                                            | 6.35                                                                                        |
| USICS     | 2014-2016 | 264.84         | 0.72                      | 11.09                                                                            | -0.86                                                                                       |
| USIVO     | 2013-2016 | 264.64         | 1.21                      | 15.18                                                                            | 2.58                                                                                        |
| USNGB     | 2012-2018 | 265.25         | 1.53                      | 11.17                                                                            | 1.44                                                                                        |

**Table S5.** Annual wetland methane emissions and trends (with *p* values obtained from two-sided *t*-test) estimated by different models in the Boreal-Arctic region (\**p*<0.1, \*\**p*<0.05, and \*\*\**p*<0.01).

| Model type             | FCH <sub>4</sub> data source | Trend (Tg CH <sub>4</sub> yr <sup>-2</sup> ) |                        | Annual emission (Tg CH <sub>4</sub> yr <sup>-2</sup> ) |
|------------------------|------------------------------|----------------------------------------------|------------------------|--------------------------------------------------------|
|                        |                              | Boreal arctic                                | <i>p</i> value         | Boreal arctic                                          |
| <b>Top-down models</b> | CTE_GOSAT                    | 0.414**                                      | 0.019                  | 36.090±1.197                                           |
|                        | CTE_SURF                     | 0.619*                                       | 0.061                  | 24.666±2.073                                           |
|                        | GELCA_SURF                   | -0.229                                       | 0.624                  | 27.503±1.530                                           |
|                        | LMDzPYVAR_GOSAT1             | 0.714***                                     | 2.685×10 <sup>-5</sup> | 24.646±1.673                                           |
|                        | LMDzPYVAR_GOSAT2             | 0.996***                                     | 0.007                  | 28.628±2.675                                           |
|                        | LMDzPYVAR_GOSAT3             | 0.505***                                     | 0.004                  | 20.808±1.313                                           |
|                        | LMDzPYVAR_GOSAT4             | 0.520**                                      | 0.027                  | 19.755±1.559                                           |

|                         |                      |           |                        |              |
|-------------------------|----------------------|-----------|------------------------|--------------|
|                         | LMDzPYVAR_GOSAT5     | 0.289***  | 0.006                  | 21.670±0.767 |
|                         | LMDzPYVAR_GOSAT6     | 0.315**   | 0.037                  | 18.388±0.981 |
|                         | LMDzPYVAR_SURF1      | 0.262*    | 0.087                  | 25.789±0.762 |
|                         | LMDzPYVAR_SURF2      | 0.145     | 0.299                  | 24.698±0.632 |
|                         | MIROCv4_SURF         | 0.422     | 0.108                  | 30.061±1.284 |
|                         | NICAM_SURF           | 0.212     | 0.346                  | 24.415±1.265 |
|                         | NTF-4DVAR_NIES_GOSAT | 0.259     | 0.248                  | 35.653±1.280 |
|                         | NTF-4DVAR_NIES_SURF  | 0.297     | 0.327                  | 27.630±1.707 |
|                         | TM5-4DVAR_GOSAT1     | 1.183***  | 0.001                  | 25.613±2.957 |
|                         | TM5-4DVAR_GOSAT2     | 1.488***  | 0.001                  | 25.523±2.723 |
|                         | TM5-4DVAR_SURF1      | 0.617***  | 0.008                  | 25.138±1.675 |
|                         | TM5-4DVAR_SURF2      | 0.802***  | 0.005                  | 25.592±2.120 |
|                         | TM5-CAMS_GOSAT       | 0.601**   | 0.035                  | 30.721±1.857 |
|                         | TM5-CAMS_SURF        | 0.591*    | 0.059                  | 29.513±1.969 |
| <b>Bottom-up models</b> | CH4MOD               | 0.100     | 0.178                  | 23.977±1.554 |
|                         | CLASSIC              | -0.774*** | 0.007                  | 14.682±6.604 |
|                         | DLEM                 | 0.009     | 0.693                  | 15.126±0.470 |
|                         | ELM                  | 0.009     | 0.938                  | 48.510±2.323 |
|                         | JULES                | 0.099**   | 0.016                  | 15.940±0.919 |
|                         | LPJ-MPI              | 0.635***  | 1.370×10 <sup>-7</sup> | 19.885±3.612 |
|                         | LPJ-wsl              | 0.031     | 0.428                  | 14.474±0.812 |
|                         | LPX-Bern             | 0.045     | 0.238                  | 16.526±0.801 |
|                         | ORCHIDEE             | 0.067     | 0.396                  | 25.858±1.624 |
|                         | SDGVM                | 0.020     | 0.543                  | 9.175±0.674  |
|                         | TEM-MDM              | 0.037     | 0.106                  | 9.330±0.481  |
|                         | TRIPLEX              | 0.097     | 0.161                  | 16.400±1.461 |
|                         | VISIT                | 0.164***  | 0.008                  | 30.017±1.403 |
|                         | <b>This study</b>    | 0.086**   | 0.017                  | 20.316±0.938 |



### Text S1. Combination of the BAWLD and WAD2M datasets

The percentage of each wetland type within each upscaled wetland grid cell was determined by combining BAWLD and WAD2M datasets. The WAD2M dataset provided the temporal dynamics of wetland extent information but without differentiating wetland types<sup>1</sup>, while the BAWLD dataset recorded the wetland extent for each wetland type but was temporally static<sup>2</sup>. Here we used the wetland type-specific extent information in BAWLD to calculate the fraction of each wetland type relative to its total wetland area. Then we derived the temporally varied wetland extent for each wetland type by multiplying the wetland extent of WAD2M by the wetland type-specific fraction calculated from the first step (Eq. 1). By doing so, we assume that the fraction of each wetland type relative to its total wetland area does not change over time because we do not have information regarding temporally varying wetland types. For the upscaling, we considered all wetland grid cells in the BAWLD dataset that provided wetland type information.

$$E_{i,t}(s) = E_{WAD2M,t}(s) \times \frac{E_{BAWLD,i}(s)}{\sum_{j=1}^n E_{BAWLD,j}(s)} \quad (1)$$

where  $E_{i,t}(s)$  is the wetland extent of the  $i$ -th wetland type used for upscaling CH<sub>4</sub> in the  $s$ -th grid cell at time  $t$ ;  $E_{WAD2M,t}(s)$  is the wetland extent for the WAD2M dataset at time  $t$ ;  $E_{BAWLD,i}(s)$  and  $E_{BAWLD,j}(s)$  are the wetland extent of the  $i$ -th and  $j$ -th wetland types in the BAWLD dataset, respectively, and  $n$  is the total number of wetland types within the  $s$ -th grid cell of the BAWLD dataset.

### Text S2. Inferring causal relationships

In the Causal-ML approach, we first used a data-driven causality inference method to identify the causal relationships between CH<sub>4</sub> emission and its abiotic and biotic drivers<sup>3,4</sup>. A causal relationship is present between two variables if changes in one variable (e.g., temperature) directly result in changes in another variable (e.g., wetland CH<sub>4</sub> emissions)<sup>4-7</sup>, all else being equal. The literature describes three ways to infer causal relationships: interventional experiments<sup>8</sup>, process-oriented model simulations<sup>9,10</sup>, and data-driven causality inference<sup>4,11,12</sup>. Interventional experiments intervene on the variable of interest while simultaneously maintaining all other factors equal, and then tests the impact of this intervention on the target variable<sup>8</sup>. Interventional experiments across large spatial scale remain challenging<sup>13</sup>. Process-oriented model simulations (i.e., computer simulations) control confounding factors and focus on the causal relationship of interest, but the model itself requires substantial expert knowledge and reasonable model structure and parameterization. Unfortunately, the current generation of bottom-up biogeochemical models are highly uncertain and poorly constrained with observed wetland CH<sub>4</sub> emissions (see the main text). Therefore, a data-driven causality inference method was selected for analyzing causal processes in wetland CH<sub>4</sub> emissions.

Specifically, we used the PCMCI method to identify the causal relationships of wetland CH<sub>4</sub> emissions. Wetland CH<sub>4</sub> emissions are controlled by multiple abiotic and biotic factors, and these processes can be asynchronous<sup>3,14-16</sup>. The PCMCI method is

particularly suitable for inferring such multi-variate controlled and time-lagged causal relationships<sup>4,6,17,18</sup>, and has been used for understanding temporal dynamics of Earth system processes beyond wetland CH<sub>4</sub> emissions<sup>3</sup>, such as climate systems<sup>4,11,18,19</sup> and land-atmosphere interactions<sup>12,20</sup>. The method contains two steps, PC (named after Peter Spirtes and Clark Glymour<sup>21</sup>) and MCI (i.e., momentary conditional independence<sup>18</sup>). The first step, PC, iteratively identifies a smaller size of relevant necessary confounders that affected the inferred causal relationship between two variables of interest (e.g., temperature and CH<sub>4</sub> flux) through conditional independence tests. Subsequently, the momentary conditional independence tests are used to detect and quantify the causal strength between the two variables of interest by removing the confounding effects from the identified necessary confounders in the PC step<sup>17,18</sup>. By avoiding conditioning on high-dimensional variables, the PCMCI improves the detection power of causal relationships<sup>17,18</sup>. We considered abiotic and biotic variables (see the input datasets in the main text) that have reliable global observations or estimates and have been suggested to be mechanistically related to wetland CH<sub>4</sub> emissions by previous studies<sup>14,22</sup>. The high predictability of the Causal-ML demonstrated that the input variables we selected explained the majority of the variance in wetland CH<sub>4</sub> dynamics. While we acknowledge that factors beyond the ones considered here could also affect wetland CH<sub>4</sub> emissions (e.g., oxygen availability, soil pH, and ferric iron and sulfate reducers<sup>22</sup>), the paucity of observations from site to global scale impedes us from including those additional variables for the causality inference and upscaling.

### **Text S3. Sensitivity of CH<sub>4</sub> dynamics to wetland extent datasets**

We used three additional wetland datasets to discuss the sensitivity of wetland CH<sub>4</sub> dynamics to uncertain wetland extent, including the static wetland dataset derived from Global Lakes and Wetlands Database (GLWD)<sup>23</sup>, and temporally dynamic wetlands<sup>24</sup> estimated by the TOPography-based hydrological MODEL (TOPMODEL). The GLWD data was derived by merging multiple surveys, maps, and inventories of lake and reservoirs, small water bodies, and wetlands. We used GLWD after excluding lakes, rivers, and reservoirs. In addition to GLWD, we used the temporally varied wetland extent derived from the TOPMODEL model<sup>24</sup>. The TOPMODEL model treated continuous or regularly saturated grid-cells as wetlands. By assuming that water pathways were mainly determined by topography, the model used a compound topographic index to estimate the water table depth and thus the wetland fraction in each grid-cell<sup>24,25</sup>. The modeled wetland extent was temporally varied with a monthly resolution, and was calibrated by observation-based data of Global Inundation Extent from Multi-Satellites (GIEMS-2) and Regularly Flooded Wetland (RFW)<sup>26</sup>, respectively. The two modeled wetland datasets constrained by different observations were referred to as TOP<sub>GIEMS-2</sub> and TOP<sub>RFW</sub>, respectively. We did not directly use the GIEMS-2 data due to its limited temporal coverage<sup>27</sup>. To focus on the sensitivity of wetland CH<sub>4</sub> emission dynamics to wetland extent changes, we kept the CH<sub>4</sub> emission intensity the same as in our baseline analysis, while replacing WAD2M with GLWD,

TOP<sub>GIEMS-2</sub>, and TOP<sub>RFW</sub>, respectively. The upscaled wetland CH<sub>4</sub> emissions using different wetland extent datasets during 2002-2021 were compared in Fig. S12.

#### **Text S4. Sensitivity of CH<sub>4</sub> dynamics to inputting datasets**

We conducted four groups of sensitivity experiments to confirm that the increasing trend and strong interannual variations of wetland CH<sub>4</sub> emissions were robust given uncertainty in the input datasets. Specifically, we first replaced the originally-used input variables of air temperature, air pressure, precipitation, and wind speed with those of the CRU JRA dataset, while keeping the other factors including soil conditions, GPP, snow, and wetlands the same. Then we upscaled the wetland CH<sub>4</sub> emissions during 2002-2021 using the updated dataset and compared the regional trend and interannual variations of wetland CH<sub>4</sub> emissions with those in the main text. Similarly, we also used the datasets from GLDAS and MERRA-2 which further provided soil temperature and soil wetness for wetland CH<sub>4</sub> upscaling. Additionally, we replaced the GPP used in the main text with that of PML-GPP, which was derived from an empirical process-model that considered the CO<sub>2</sub> fertilization effects, and was constrained by multi-source remote sensing observations<sup>28</sup>. The upscaled wetland CH<sub>4</sub> emissions using different sources of input variables during 2002-2021 were compared in Fig. S13, and had consistent increasing trends in wetland CH<sub>4</sub> emissions.

## References:

- 1 Zhang, Z. *et al.* Development of the global dataset of Wetland Area and Dynamics for Methane Modeling (WAD2M). *Earth System Science Data* **13**, 2001-2023 (2021).
- 2 Olefeldt, D. *et al.* The Boreal–Arctic Wetland and Lake Dataset (BAWLD). *Earth system science data* **13**, 5127-5149 (2021).
- 3 Yuan, K. *et al.* Causality guided machine learning model on wetland CH<sub>4</sub> emissions across global wetlands. *Agricultural and Forest Meteorology* **324**, 109115 (2022).
- 4 Runge, J. *et al.* Inferring causation from time series in Earth system sciences. *Nature communications* **10**, 1-13 (2019).
- 5 Pearl, J., Glymour, M. & Jewell, N. P. *Causal inference in statistics: A primer.* (John Wiley & Sons, 2016).
- 6 Runge, J., Gerhardus, A., Varando, G., Eyring, V. & Camps-Valls, G. Causal inference for time series. *Nature Reviews Earth & Environment*, 1-19 (2023).
- 7 Eichler, M. Causal inference in time series analysis. *Causality: Statistical perspectives and applications*, 327-354 (2012).
- 8 Imbens, G. W. & Rubin, D. B. *Causal inference in statistics, social, and biomedical sciences.* (Cambridge University Press, 2015).
- 9 Li, F. *et al.* Vegetation clumping modulates global photosynthesis through adjusting canopy light environment. *Global Change Biology* **29**, 731-746 (2023).
- 10 Gillett, N. P. *et al.* The detection and attribution model intercomparison project (DAMIP v1. 0) contribution to CMIP6. *Geoscientific Model Development* **9**, 3685-3697 (2016).
- 11 Li, F. *et al.* Wetter California projected by CMIP6 models with observational constraints under a high GHG emission scenario. *Earth's Future* **10**, e2022EF002694 (2022).
- 12 Yuan, K., Zhu, Q., Riley, W. J., Li, F. & Wu, H. Understanding and reducing the uncertainties of land surface energy flux partitioning within CMIP6 land models. *Agricultural and Forest Meteorology* **319**, 108920 (2022).
- 13 Runge, J. *et al.* Inferring causation from time series in Earth system sciences. *Nature communications* **10**, 2553 (2019).
- 14 Knox, S. H. *et al.* Identifying dominant environmental predictors of freshwater wetland methane fluxes across diurnal to seasonal time scales. *Global change biology* **27**, 3582-3604 (2021).
- 15 Sturtevant, C. *et al.* Identifying scale-emergent, nonlinear, asynchronous processes of wetland methane exchange. *Journal of Geophysical Research: Biogeosciences* **121**, 188-204 (2016).
- 16 Chang, K.-Y. *et al.* Substantial hysteresis in emergent temperature sensitivity of global wetland CH<sub>4</sub> emissions. *Nature communications* **12**, 1-10 (2021).
- 17 Runge, J., Nowack, P., Kretschmer, M., Flaxman, S. & Sejdinovic, D. Detecting and quantifying causal associations in large nonlinear time series datasets. *Science advances* **5**, eaau4996 (2019).
- 18 Runge, J. *et al.* Identifying causal gateways and mediators in complex spatio-temporal systems. *Nature communications* **6**, 8502 (2015).
- 19 Kretschmer, M., Coumou, D., Donges, J. F. & Runge, J. Using causal effect networks to analyze different Arctic drivers of midlatitude winter circulation. *Journal of climate* **29**, 4069-4081 (2016).
- 20 Krich, C. *et al.* Estimating causal networks in biosphere–atmosphere interaction with the PCMCI approach. *Biogeosciences* **17**, 1033-1061 (2020).
- 21 Spirtes, P., Glymour, C. N. & Scheines, R. *Causation, prediction, and search.* (MIT press,

- 2000).
- 22 Le Mer, J. & Roger, P. Production, oxidation, emission and consumption of methane by soils:  
a review. *European journal of soil biology* **37**, 25-50 (2001).
- 23 Lehner, B. & Döll, P. Development and validation of a global database of lakes, reservoirs and  
wetlands. *Journal of hydrology* **296**, 1-22 (2004).
- 24 Xi, Y. *et al.* Gridded maps of wetlands dynamics over mid-low latitudes for 1980–2020 based  
on TOPMODEL. *Scientific Data* **9**, 347 (2022).
- 25 Xi, Y., Peng, S., Ciais, P. & Chen, Y. Future impacts of climate change on inland Ramsar  
wetlands. *Nature Climate Change* **11**, 45-51 (2021).
- 26 Tootchi, A., Jost, A. & Ducharme, A. Multi-source global wetland maps combining surface  
water imagery and groundwater constraints. *Earth System Science Data* **11**, 189-220 (2019).
- 27 Prigent, C., Jimenez, C. & Bousquet, P. Satellite-derived global surface water extent and  
dynamics over the last 25 years (GIEMS-2). *Journal of Geophysical Research: Atmospheres*  
**125**, e2019JD030711 (2020).
- 28 Zhang, Y. *et al.* Coupled estimation of 500 m and 8-day resolution global evapotranspiration  
and gross primary production in 2002–2017. *Remote sensing of environment* **222**, 165-182  
(2019).
- 29 Sonnentag, O. & Helbig, M. *FLUXNET-CH4 CA-SCB Scotty Creek Bog*, 2020).
- 30 Sonnentag, O. & Helbig, M. *FLUXNET-CH4 CA-SCC Scotty Creek Landscape*,  
<<https://doi:10.18140/FLX/1669628>> (2020).
- 31 Schmid, H. P. & Klatt, J. *FLUXNET-CH4 DE-SjN Schechenfilz Nord*, 2020).
- 32 Vesala, T., Tuittila, E.-S., Mammarella, I. & Alekseychik, P. *FLUXNET-CH4 FI-Si2 Siikaneva-  
2 Bog*, 2020).
- 33 Ueyama, M., Hirano, T. & Kominami, Y. *FLUXNET-CH4 JP-BBY Bibai bog*, 2020).
- 34 Euskirchen, E. & Edgar, C. *FLUXNET-CH4 US-BZB Bonanza Creek Thermokarst Bog*, 2020).
- 35 Iwata, H., Ueyama, M. & Harazono, Y. *FLUXNET-CH4 US-Uaf University of Alaska,  
Fairbanks*, 2020).
- 36 Euskirchen, E. S., Edgar, C., Turetsky, M., Waldrop, M. P. & Harden, J. W. Differential  
response of carbon fluxes to climate in three peatland ecosystems that vary in the presence and  
stability of permafrost. *Journal of Geophysical Research: Biogeosciences* **119**, 1576-1595  
(2014).
- 37 Helbig, M. *et al.* The positive net radiative greenhouse gas forcing of increasing methane  
emissions from a thawing boreal forest-wetland landscape. *Global change biology* **23**, 2413-  
2427 (2017).
- 38 Koebsch, F. & Jurasinski, G. *FLUXNET-CH4 DE-Hte Huetelmoor*, 2020).
- 39 Sachs, T. & Wille, C. *FLUXNET-CH4 DE-Zrk Zarnekow*, 2020).
- 40 Lohila, A. *et al.* *FLUXNET-CH4 FI-Lom Lompolojankka*, 2020).
- 41 Vesala, T., Tuittila, E.-S., Mammarella, I. & Rinne, J. *FLUXNET-CH4 FI-Sii Siikaneva*, 2020).
- 42 Nilsson, M. B. & Peichl, M. *FLUXNET-CH4 SE-Deg Degero*, 2020).
- 43 Jansen, J., Friberg, T., Jammet, M. & Crill, P. *FLUXNET-CH4 SE-St1 Stordalen grassland*,  
2020).
- 44 Euskirchen, E. & Edgar, C. *FLUXNET-CH4 US-BZF Bonanza Creek Rich Fen*, 2020).
- 45 Desai, A. R. & Thom, J. *FLUXNET-CH4 US-Los Lost Creek*, 2020).
- 46 Jammet, M. *et al.* Year-round CH 4 and CO 2 flux dynamics in two contrasting freshwater

- ecosystems of the subarctic. *Biogeosciences* **14**, 5189-5216 (2017).
- 47 Hanis, K., Tenuta, M., Amiro, B. & Papakyriakou, T. Seasonal dynamics of methane emissions  
from a subarctic fen in the Hudson Bay Lowlands. *Biogeosciences* **10**, 4465-4479 (2013).
- 48 Hinkle, C. R. & Bracho, R. *FLUXNET-CH4 US-DPW Disney Wilderness Preserve Wetland*,  
2020).
- 49 Holm, G. O. *et al. FLUXNET-CH4 US-LA2 Salvador WMA Freshwater Marsh*, 2020).
- 50 Matthes, J. H. *et al. FLUXNET-CH4 US-Myb Mayberry Wetland*, 2020).
- 51 Bohrer, G. & Morin, T. H. *FLUXNET-CH4 US-ORv Olentangy River Wetland Research Park*,  
2020).
- 52 Shortt, R., Hemes, K., Szutu, D., Verfaillie, J. & Baldocchi, D. *FLUXNET-CH4 US-Sne  
Sherman Island Restored Wetland*, 2020).
- 53 Valach, A. C. *et al. FLUXNET-CH4 US-Tw1 Twitchell Wetland West Pond*, 2020).
- 54 Eichelmann, E. *et al. FLUXNET-CH4 US-Tw4 Twitchell East End Wetland*, 2020).
- 55 Chen, J. & Chu, H. *FLUXNET-CH4 US-WPT Winous Point North Marsh*, 2020).
- 56 Jackowicz-Korczyński, M. *et al.* Annual cycle of methane emission from a subarctic peatland.  
*Journal of Geophysical Research: Biogeosciences* **115** (2010).
- 57 Göckede, M. *FLUXNET-CH4 RU-Ch2 Chersky reference*, 2020).
- 58 Göckede, M. *et al.* Negative feedback processes following drainage slow down permafrost  
degradation. *Global change biology* **25**, 3254-3266 (2019).
- 59 Lars Kutzbach, T. S., Julia Boike, Christian Wille, Peter Schreiber, Moritz Langer, Eva-Maria  
Pfeiffer, Benjamin Runkle, Günter Stoof, David Holl, Lars Heling, Norman Rüggen.  
(2020).
- 60 Zona, D. & Oechel, W. C. *FLUXNET-CH4 US-Beo Barrow Environmental Observatory (BEO)  
tower*, 2020).
- 61 Zona, D. & Oechel, W. C. *FLUXNET-CH4 US-Bes Barrow-Bes (Biocomplexity Experiment  
South tower)*, 2020).
- 62 Euskirchen, E., Bret-Harte, M. & Edgar, C. *FLUXNET-CH4 US-ICs Imnavait Creek Watershed  
Wet Sedge Tundra*, 2020).
- 63 Zona, D. & Oechel, W. C. *FLUXNET-CH4 US-Ivo Ivoituk*, 2020).
- 64 Torn, M. & Dengel, S. *FLUXNET-CH4 US-NGB NGEE Arctic Barrow*, 2020).
- 65 Taylor, M., Celis, G., Ledman, J., Bracho, R. & Schuur, E. Methane efflux measured by eddy  
covariance in Alaskan upland tundra undergoing permafrost degradation. *Journal of  
Geophysical Research: Biogeosciences* **123**, 2695-2710 (2018).
- 66 Kuhn, M. A. *et al.* BAWLD-CH 4: a comprehensive dataset of methane fluxes from boreal and  
arctic ecosystems. *Earth System Science Data* **13**, 5151-5189 (2021).
- 67 Delwiche, K. B. *et al.* FLUXNET-CH4: A global, multi-ecosystem dataset and analysis of  
methane seasonality from freshwater wetlands. *Earth System Science Data Discussions*, 1-111  
(2021).
- 68 Knox, S. H. *et al.* FLUXNET-CH4 synthesis activity: Objectives, observations, and future  
directions. *Bulletin of the American Meteorological Society* **100**, 2607-2632 (2019).
- 69 Bao, T., Jia, G. & Xu, X. Wetland Heterogeneity Determines Methane Emissions: A Pan-Arctic  
Synthesis. *Environmental Science & Technology* **55**, 10152-10163 (2021).
- 70 Long, K. D., Flanagan, L. B. & Cai, T. Diurnal and seasonal variation in methane emissions in  
a northern Canadian peatland measured by eddy covariance. *Global change biology* **16**, 2420-

- 2435 (2010).
- 71 Davidson, S. J. *et al.* Vegetation type dominates the spatial variability in CH<sub>4</sub> emissions across multiple Arctic tundra landscapes. *Ecosystems* **19**, 1116-1132 (2016).
- 72 Bäckstrand, K. *et al.* Annual carbon gas budget for a subarctic peatland, Northern Sweden. *Biogeosciences* **7**, 95-108 (2010).
- 73 Bäckstrand, K., Crill, P. M., Mastepanov, M., Christensen, T. R. & Bastviken, D. Total hydrocarbon flux dynamics at a subarctic mire in northern Sweden. *Journal of geophysical research: Biogeosciences* **113** (2008).
- 74 Veretennikova, E. & Dyukarev, E. Diurnal variations in methane emissions from West Siberia peatlands in summer. *Russian Meteorology and Hydrology* **42**, 319-326 (2017).
- 75 von Fischer, J. C., Rhew, R. C., Ames, G. M., Fosdick, B. K. & von Fischer, P. E. Vegetation height and other controls of spatial variability in methane emissions from the Arctic coastal tundra at Barrow, Alaska. *Journal of Geophysical Research: Biogeosciences* **115** (2010).
- 76 Rhew, R. C., Teh, Y. A. & Abel, T. Methyl halide and methane fluxes in the northern Alaskan coastal tundra. *Journal of Geophysical Research: Biogeosciences* **112** (2007).
- 77 Turetsky, M. *et al.* Short-term response of methane fluxes and methanogen activity to water table and soil warming manipulations in an Alaskan peatland. *Journal of Geophysical Research: Biogeosciences* **113** (2008).
- 78 Wickland, K. P., Striegl, R. G., Neff, J. C. & Sachs, T. Effects of permafrost melting on CO<sub>2</sub> and CH<sub>4</sub> exchange of a poorly drained black spruce lowland. *Journal of Geophysical Research: Biogeosciences* **111** (2006).
- 79 Olefeldt, D. *et al.* A decade of boreal rich fen greenhouse gas fluxes in response to natural and experimental water table variability. *Global change biology* **23**, 2428-2440 (2017).
- 80 Liebner, S. *et al.* Shifts in methanogenic community composition and methane fluxes along the degradation of discontinuous permafrost. *Frontiers in Microbiology* **6**, 356 (2015).
- 81 Brown, M. G., Humphreys, E. R., Moore, T. R., Roulet, N. T. & Lafleur, P. M. Evidence for a nonmonotonic relationship between ecosystem-scale peatland methane emissions and water table depth. *Journal of Geophysical Research: Biogeosciences* **119**, 826-835 (2014).
- 82 Van der Molen, M. *et al.* The growing season greenhouse gas balance of a continental tundra site in the Indigirka lowlands, NE Siberia. *Biogeosciences* **4**, 985-1003 (2007).
- 83 Corradi, C., Kolle, O., Walter, K., Zimov, S. & Schulze, E. D. Carbon dioxide and methane exchange of a north-east Siberian tussock tundra. *Global Change Biology* **11**, 1910-1925 (2005).
- 84 Desyatkin, A. R. *et al.* CH<sub>4</sub> emission from different stages of thermokarst formation in Central Yakutia, East Siberia. *Soil Science and Plant Nutrition* **55**, 558-570 (2009).
- 85 Emmerton, C. *et al.* The net exchange of methane with high Arctic landscapes during the summer growing season. *Biogeosciences* **11**, 3095-3106 (2014).
- 86 Bienida, A. *et al.* Methane emissions from fens in Alberta's boreal region: reference data for functional evaluation of restoration outcomes. *Wetlands Ecology and Management* **28**, 559-575 (2020).
- 87 Murray, K. R., Barlow, N. & Strack, M. Methane emissions dynamics from a constructed fen and reference sites in the Athabasca Oil Sands Region, Alberta. *Science of the Total Environment* **583**, 369-381 (2017).
- 88 Johnston, C. E. *et al.* Erratum: Effect of permafrost thaw on CO<sub>2</sub> and CH<sub>4</sub> exchange in a western Alaska peatland chronosequence (2013 Environ. Res. Lett. 9 085004). *Environmental*

- Research Letters* **9** (2014).
- 89 Trudeau, N. C., Garneau, M. & Pelletier, L. Methane fluxes from a patterned fen of the northeastern part of the La Grande river watershed, James Bay, Canada. *Biogeochemistry* **113**, 409-422 (2013).
- 90 Nadeau, D. F., Rousseau, A. N., Coursolle, C., Margolis, H. A. & Parlange, M. B. Summer methane fluxes from a boreal bog in northern Quebec, Canada, using eddy covariance measurements. *Atmospheric Environment* **81**, 464-474 (2013).
- 91 Marushchak, M. *et al.* Methane dynamics in warming tundra of Northeast European Russia. *Biogeosciences Discussions* **12** (2015).
- 92 Pelletier, L., Moore, T., Roulet, N., Garneau, M. & Beaulieu-Audy, V. Methane fluxes from three peatlands in the La Grande Riviere watershed, James Bay lowland, Canada. *Journal of Geophysical Research: Biogeosciences* **112** (2007).
- 93 Riutta, T., Korrensalo, A., Laine, A. M., Laine, J. & Tuittila, E.-S. Interacting effects of vegetation components and water level on methane dynamics in a boreal fen. *Biogeosciences* **17**, 727-740 (2020).
- 94 Heikkinen, J. E., Virtanen, T., Huttunen, J. T., Elsakov, V. & Martikainen, P. J. Carbon balance in East European tundra. *Global biogeochemical cycles* **18** (2004).
- 95 Merbold, L. *et al.* Artificial drainage and associated carbon fluxes (CO<sub>2</sub>/CH<sub>4</sub>) in a tundra ecosystem. *Global Change Biology* **15**, 2599-2614 (2009).
- 96 Parmentier, F. *et al.* Spatial and temporal dynamics in eddy covariance observations of methane fluxes at a tundra site in northeastern Siberia. *Journal of Geophysical Research: Biogeosciences* **116** (2011).
- 97 Sachs, T., Giebels, M., Boike, J. & Kutzbach, L. Environmental controls on CH<sub>4</sub> emission from polygonal tundra on the microsite scale in the Lena river delta, Siberia. *Global Change Biology* **16**, 3096-3110 (2010).
- 98 Sachs, T., Wille, C., Boike, J. & Kutzbach, L. Environmental controls on ecosystem-scale CH<sub>4</sub> emission from polygonal tundra in the Lena River Delta, Siberia. *Journal of Geophysical Research: Biogeosciences* **113** (2008).
- 99 Myers-Smith, I. H., McGuire, A. D., Harden, J. W. & Chapin III, F. S. Influence of disturbance on carbon exchange in a permafrost collapse and adjacent burned forest. *Journal of Geophysical Research: Biogeosciences* **112** (2007).
- 100 Hartley, I. P. *et al.* Quantifying landscape-level methane fluxes in subarctic Finland using a multiscale approach. *Global Change Biology* **21**, 3712-3725 (2015).
- 101 Pearson, M. *et al.* Effects of temperature rise and water-table-level drawdown on greenhouse gas fluxes of boreal sedge fens. (2015).
- 102 Dinsmore, K. J. *et al.* Growing season CH<sub>4</sub> and N<sub>2</sub>O fluxes from a subarctic landscape in northern Finland; from chamber to landscape scale. *Biogeosciences* **14**, 799-815 (2017).
- 103 Sabrekov, A. *et al.* Methane emissions from north and middle taiga mires of Western Siberia: Bc8 standard model. *Moscow University Soil Science Bulletin* **67**, 45-53 (2012).
- 104 Pirk, N. *et al.* Toward a statistical description of methane emissions from arctic wetlands. *Ambio* **46**, 70-80 (2017).
- 105 Ström, L., Tagesson, T., Mastepanov, M. & Christensen, T. R. Presence of *Eriophorum scheuchzeri* enhances substrate availability and methane emission in an Arctic wetland. *Soil Biology and Biochemistry* **45**, 61-70 (2012).



- 106 Korrensalo, A. *et al.* Small spatial variability in methane emission measured from a wet  
patterned boreal bog. *Biogeosciences* **15**, 1749-1761 (2018).
- 107 Öquist, M. & Svensson, B. Vascular plants as regulators of methane emissions from a subarctic  
mire ecosystem. *Journal of Geophysical Research: Atmospheres* **107**, ACL 10-11-ACL 10-10  
(2002).
- 108 Malhotra, A. & Roulet, N. Environmental correlates of peatland carbon fluxes in a thawing  
landscape: do transitional thaw stages matter? *Biogeosciences* **12**, 3119-3130 (2015).
- 109 (!!! INVALID CITATION !!! 68,103,105).
- 110 Strack, M., Waller, M. & Waddington, J. Sedge succession and peatland methane dynamics: A  
potential feedback to climate change. *Ecosystems* **9**, 278-287 (2006).
- 111 (!!! INVALID CITATION !!! 107,108).
- 112 Takakai, F. *et al.* CH<sub>4</sub> and N<sub>2</sub>O emissions from a forest-alas ecosystem in the permafrost taiga  
forest region, eastern Siberia, Russia. *Journal of Geophysical Research: Biogeosciences* **113**  
(2008).
- 113 Sabrekov, A., Glagolev, M., Kleptsova, I. & Maksyutov, S. Methane emission from West  
Siberia tundra mires. *Environmental Dynamics and Global Climate Change* **2**, 1-16 (2011).
- 114 Cooper, M. D. *et al.* Limited contribution of permafrost carbon to methane release from thawing  
peatlands. *Nature Climate Change* **7**, 507-511 (2017).
- 115 Van Huissteden, J., Maximov, T., Kononov, A. & Dolman, A. Summer soil CH<sub>4</sub> emission and  
uptake in taiga forest near Yakutsk, Eastern Siberia. *agricultural and forest meteorology* **148**,  
2006-2012 (2008).
- 116 Van Huissteden, J., Maximov, T. & Dolman, A. High methane flux from an arctic floodplain  
(Indigirka lowlands, eastern Siberia). *Journal of Geophysical Research: Biogeosciences* **110**  
(2005).
- 117 Munir, T. M. & Strack, M. Methane flux influenced by experimental water table drawdown and  
soil warming in a dry boreal continental bog. *Ecosystems* **17**, 1271-1285 (2014).
- 118 Luan, J. & Wu, J. Gross photosynthesis explains the ‘artificial bias’ of methane fluxes by static  
chamber (opaque versus transparent) at the hummocks in a boreal peatland. *Environmental  
Research Letters* **9**, 105005 (2014).
- 119 Sabrekov, A. *et al.* The spatial variability of methane emission from subtaiga and forest–steppe  
grass–moss fens of Western Siberia. *Biology Bulletin* **43**, 162-168 (2016).
- 120 Sabrekov, A., Runkle, B. R., Glagolev, M., Kleptsova, I. & Maksyutov, S. Seasonal variability  
as a source of uncertainty in the West Siberian regional CH<sub>4</sub> flux upscaling. *Environmental  
Research Letters* **9**, 045008 (2014).
- 121 Wille, C., Kutzbach, L., Sachs, T., Wagner, D. & PFEIFFER, E. M. Methane emission from  
Siberian arctic polygonal tundra: eddy covariance measurements and modeling. *Global Change  
Biology* **14**, 1395-1408 (2008).
- 122 Zona, D. *et al.* Methane fluxes during the initiation of a large-scale water table manipulation  
experiment in the Alaskan Arctic tundra. *Global Biogeochemical Cycles* **23** (2009).
